# Supplementary material for: From lime to silica and alumina: systematic modeling of cement clinkers using a general force-field
Source: Royal Society of Chemistry journal article supplement (doi:10.1039/c5cp02823j), 2015-01-01
Supplement: c5cp02823j1.pdf [file c5cp02823j1.pdf]

**Supporting Information for**

**From Lime to Silica and Alumina:**

**Systematic Modeling of Cement Clinkers using a General Force-Field**

A. A. Freitas<sup>1,2</sup>, R. L. Santos<sup>1,2</sup>, R. Colaço<sup>2,3</sup>, R. Bayão Horta<sup>3</sup>, J. N. Canongia Lopes<sup>2,3</sup>

<sup>1</sup>CIMPOR - Cimentos de Portugal, SGPS S.A., Rua Alexandre Herculano, 35, 1250-009 Lisboa, Portugal

<sup>2</sup>Centro de Química Estrutural, <sup>3</sup>Instituto Superior Técnico, University of Lisbon, Av. Rovisco Pais, 1049-  
001 Lisboa, Portugal

**Table S1.** Structural data for selected crystalline phases of the lime-silica-alumina system. Buckingham potential MD data in italic and relative deviations between MD and experimental results in parenthesis.

| name                                      | alite                              | alite                             | belite                           | belite                           | belite                            | rankinite                                      | wollastonite                     | wollastonite                      | -                                              | mayenite                                          | krotite                            | grossite                          | gehlenite                                        |
|-------------------------------------------|------------------------------------|-----------------------------------|----------------------------------|----------------------------------|-----------------------------------|------------------------------------------------|----------------------------------|-----------------------------------|------------------------------------------------|---------------------------------------------------|------------------------------------|-----------------------------------|--------------------------------------------------|
| allotrope                                 | $M_1$                              | $M_3$                             | $\alpha$                         | $\beta$                          | $\gamma$                          | -                                              | $\alpha$                         | $\beta$                           | -                                              | -                                                 | -                                  | -                                 | -                                                |
| formula                                   | Ca <sub>3</sub> SiO <sub>5</sub>   | Ca <sub>3</sub> SiO <sub>5</sub>  | Ca <sub>2</sub> SiO <sub>4</sub> | Ca <sub>2</sub> SiO <sub>4</sub> | Ca <sub>2</sub> SiO <sub>4</sub>  | Ca <sub>3</sub> Si <sub>2</sub> O <sub>7</sub> | CaSiO <sub>3</sub>               | CaSiO <sub>3</sub>                | Ca <sub>3</sub> Al <sub>2</sub> O <sub>6</sub> | Ca <sub>12</sub> Al <sub>14</sub> O <sub>33</sub> | CaAl <sub>2</sub> O <sub>4</sub>   | CaAl <sub>4</sub> O <sub>7</sub>  | Ca <sub>2</sub> Al <sub>2</sub> SiO <sub>7</sub> |
| CCN                                       | C <sub>3</sub> S                   | C <sub>3</sub> S                  | C <sub>2</sub> S                 | C <sub>2</sub> S                 | C <sub>2</sub> S                  | C <sub>3</sub> S <sub>2</sub>                  | CS                               | CS                                | C <sub>3</sub> A                               | C <sub>12</sub> A <sub>7</sub>                    | CA                                 | CA <sub>2</sub>                   | C <sub>2</sub> AS                                |
| space group                               | <i>Pc</i>                          | <i>Cm</i>                         | <i>P6<sub>3</sub>mc</i>          | <i>P2<sub>1</sub>/n</i>          | <i>Pbnm</i>                       | <i>P2<sub>1</sub>/a</i>                        | <i>P-1</i>                       | <i>P2<sub>1</sub>/a</i>           | <i>Pa3</i>                                     | <i>I-43d</i>                                      | <i>P2<sub>1</sub>/n</i>            | <i>C2/c</i>                       | <i>P-42<sub>1</sub>m</i>                         |
| reference                                 | 23                                 | 24                                | 25                               | 26                               | 27                                | 28                                             | 29                               | 30                                | 31                                             | 32                                                | 33                                 | 34                                | 35                                               |
| MD cells                                  | 2×8×5                              | 2×8×3                             | 10×11×8                          | 10×11×8                          | 10×8×6                            | 5×6×8                                          | 7×8×8                            | 4×7×8                             | 4×4×4                                          | 5×5×5                                             | 6×7×4                              | 4×6×10                            | 7×7×10                                           |
| MD atoms                                  | 12960                              | 15552                             | 12320                            | 13440                            | 11200                             | 11520                                          | 13440                            | 13440                             | 16896                                          | 14750                                             | 14112                              | 11520                             | 11760                                            |
| <i>a</i> / Å                              | 27.874<br><i>28.071</i><br>(0.70)  | 33.083<br><i>33.373</i><br>(0.88) | 5.579<br><i>5.593</i><br>(0.26)  | 5.502<br><i>5.617</i><br>(2.09)  | 5.081<br><i>5.247</i><br>(3.27)   | 10.600<br><i>10.667</i><br>(0.64)              | 7.940<br><i>7.934</i><br>(-0.08) | 15.426<br><i>15.445</i><br>(0.12) | 15.263<br><i>15.270</i><br>(0.05)              | 11.979<br><i>12.015</i><br>(0.29)                 | 8.700<br><i>8.673</i><br>(-0.31)   | 12.840<br><i>12.957</i><br>(0.91) | 7.690<br><i>7.722</i><br>(0.42)                  |
| <i>b</i> / Å                              | 7.059<br><i>7.060</i><br>(0.02)    | 7.027<br><i>7.192</i><br>(2.34)   | 5.579<br><i>5.628</i><br>(0.87)  | 6.762<br><i>6.848</i><br>(1.27)  | 11.224<br><i>11.296</i><br>(0.64) | 8.920<br><i>9.068</i><br>(1.65)                | 7.320<br><i>7.358</i><br>(0.52)  | 7.320<br><i>7.364</i><br>(0.60)   | 15.263<br><i>15.270</i><br>(0.05)              | 11.979<br><i>12.017</i><br>(0.31)                 | 8.092<br><i>8.171</i><br>(0.98)    | 8.862<br><i>8.748</i><br>(-1.29)  | 7.690<br><i>7.722</i><br>(0.42)                  |
| <i>c</i> / Å                              | 12.258<br><i>12.233</i><br>(-0.20) | 18.499<br><i>18.682</i><br>(0.49) | 7.150<br><i>7.029</i><br>(-1.69) | 9.339<br><i>9.381</i><br>(0.45)  | 6.778<br><i>6.805</i><br>(0.39)   | 7.890<br><i>8.415</i><br>(3.23)                | 7.070<br><i>7.192</i><br>(1.73)  | 7.066<br><i>7.191</i><br>(1.77)   | 15.263<br><i>15.270</i><br>(0.05)              | 11.979<br><i>12.017</i><br>(0.32)                 | 15.191<br><i>15.109</i><br>(-0.54) | 5.431<br><i>5.471</i><br>(0.74)   | 5.100<br><i>5.069</i><br>(-0.61)                 |
| <i>α</i> / °                              | 90.00<br><i>89.99</i>              | 90.00<br><i>90.02</i>             | 90.00<br><i>90.05</i>            | 90.00<br><i>90.00</i>            | 90.00<br><i>90.00</i>             | 90.00<br><i>90.00</i>                          | 90.00<br><i>89.95</i>            | 90.00<br><i>90.00</i>             | 90.00<br><i>90.00</i>                          | 90.00<br><i>90.01</i>                             | 90.00<br><i>90.00</i>              | 90.00<br><i>90.00</i>             | 90.00<br><i>90.00</i>                            |
| <i>β</i> / °                              | 116.03<br><i>115.81</i>            | 94.12<br><i>93.93</i>             | 90.00<br><i>89.96</i>            | 94.14<br><i>96.94</i>            | 90.00<br><i>90.00</i>             | 119.60<br><i>120.75</i>                        | 95.37<br><i>93.32</i>            | 95.40<br><i>93.54</i>             | 90.00<br><i>90.00</i>                          | 90.00<br><i>90.02</i>                             | 90.17<br><i>90.13</i>              | 106.83<br><i>106.22</i>           | 90.00<br><i>90.00</i>                            |
| <i>γ</i> / °                              | 90.00<br><i>90.01</i>              | 90.00<br><i>89.98</i>             | 120.00<br><i>119.61</i>          | 90.00<br><i>90.00</i>            | 90.00<br><i>90.00</i>             | 90.00<br><i>90.00</i>                          | 103.43<br><i>103.43</i>          | 90.00<br><i>90.00</i>             | 90.00<br><i>90.00</i>                          | 90.00<br><i>90.03</i>                             | 90.00<br><i>90.00</i>              | 90.00<br><i>90.00</i>             | 90.00<br><i>90.00</i>                            |
| <i>V</i> <sub>cell</sub> / Å <sup>3</sup> | 2167.24<br><i>2182.50</i>          | 4289.43<br><i>4473.14</i>         | 192.73<br><i>192.38</i>          | 346.55<br><i>358.91</i>          | 386.54<br><i>403.31</i>           | 648.66<br><i>677.14</i>                        | 397.82<br><i>407.69</i>          | 794.33<br><i>816.44</i>           | 3555.66<br><i>3560.75</i>                      | 1719.12<br><i>1735.04</i>                         | 1069.45<br><i>1070.71</i>          | 591.54<br><i>595.47</i>           | 301.59<br><i>302.28</i>                          |
| <i>d</i> / g.cm <sup>-3</sup>             | 3.150<br><i>3.128</i><br>(-0.70)   | 3.182<br><i>3.072</i><br>(-3.47)  | 3.073<br><i>3.079</i><br>(0.18)  | 3.301<br><i>3.194</i><br>(-3.24) | 2.960<br><i>2.838</i><br>(-4.13)  | 2.953<br><i>2.830</i><br>(-4.17)               | 2.909<br><i>2.840</i><br>(-2.38) | 2.914<br><i>2.836</i><br>(-2.67)  | 3.028<br><i>3.027</i><br>(-0.02)               | 2.690<br><i>2.671</i><br>(-0.85)                  | 2.950<br><i>2.942</i><br>(-0.09)   | 2.919<br><i>2.938</i><br>(0.65)   | 3.019<br><i>3.037</i><br>(0.60)                  |

**Table S2.** Statistical distribution of  $Q^n(mAl)$  units in amorphous materials with ratio C/S = 1.5 according to the Loewenstein's rule. The corresponding MD result is reported in italic.

|         | CaO:SiO <sub>2</sub> :Al <sub>2</sub> O <sub>3</sub><br>58.3:38.8:2.9 |             |             |             |             | CaO:SiO <sub>2</sub> :Al <sub>2</sub> O <sub>3</sub><br>56.5:37.6:5.9 |             |             |             |             | CaO:SiO <sub>2</sub> :Al <sub>2</sub> O <sub>3</sub><br>54.6:36.4:9.1 |             |             |             |             |
|---------|-----------------------------------------------------------------------|-------------|-------------|-------------|-------------|-----------------------------------------------------------------------|-------------|-------------|-------------|-------------|-----------------------------------------------------------------------|-------------|-------------|-------------|-------------|
| $mAl$   | $Q^0$                                                                 | $Q^1$       | $Q^2$       | $Q^3$       | $Q^4$       | $Q^0$                                                                 | $Q^1$       | $Q^2$       | $Q^3$       | $Q^4$       | $Q^0$                                                                 | $Q^1$       | $Q^2$       | $Q^3$       | $Q^4$       |
| 0       | 1.00                                                                  | 0.85        | 0.72        | 0.61        | 0.52        | 1.00                                                                  | 0.69        | 0.47        | 0.32        | 0.22        | 1.00                                                                  | 0.50        | 0.25        | 0.13        | 0.06        |
|         | <i>1.00</i>                                                           | <i>0.78</i> | <i>0.63</i> | <i>0.51</i> | <i>0.41</i> | <i>1.00</i>                                                           | <i>0.66</i> | <i>0.44</i> | <i>0.27</i> | <i>0.18</i> | <i>1.00</i>                                                           | <i>0.51</i> | <i>0.28</i> | <i>0.15</i> | <i>0.05</i> |
| 1       |                                                                       | 0.15        | 0.26        | 0.33        | 0.37        |                                                                       | 0.31        | 0.43        | 0.44        | 0.41        |                                                                       | 0.50        | 0.50        | 0.38        | 0.25        |
|         |                                                                       | <i>0.22</i> | <i>0.33</i> | <i>0.38</i> | <i>0.45</i> |                                                                       | <i>0.34</i> | <i>0.44</i> | <i>0.45</i> | <i>0.30</i> |                                                                       | <i>0.49</i> | <i>0.50</i> | <i>0.41</i> | <i>0.31</i> |
| 2       |                                                                       |             | 0.02        | 0.06        | 0.10        |                                                                       |             | 0.10        | 0.20        | 0.28        |                                                                       |             | 0.25        | 0.37        | 0.37        |
|         |                                                                       |             | <i>0.05</i> | <i>0.10</i> | <i>0.10</i> |                                                                       |             | <i>0.12</i> | <i>0.25</i> | <i>0.38</i> |                                                                       |             | <i>0.21</i> | <i>0.35</i> | <i>0.35</i> |
| 3       |                                                                       |             |             | 0.00        | 0.01        |                                                                       |             |             | 0.03        | 0.08        |                                                                       |             |             | 0.12        | 0.25        |
|         |                                                                       |             |             | <i>0.01</i> | <i>0.03</i> |                                                                       |             |             | <i>0.04</i> | <i>0.14</i> |                                                                       |             |             | <i>0.10</i> | <i>0.24</i> |
| 4       |                                                                       |             |             |             | 0.00        |                                                                       |             |             |             | 0.01        |                                                                       |             |             |             | 0.06        |
|         |                                                                       |             |             |             | <i>0.00</i> |                                                                       |             |             |             | <i>0.00</i> |                                                                       |             |             |             | <i>0.06</i> |
| $Q^n$ % | 12.8                                                                  | 35.6        | 35.3        | 14.5        | 1.88        | 7.12                                                                  | 30.1        | 37.3        | 21.4        | 3.46        | 4.14                                                                  | 23.7        | 37.8        | 27.9        | 6.50        |

**Table S3.** Statistical distribution of  $Q^n(mAl)$  units in amorphous materials with ratio C/S = 1.0 according to the Loewenstein's rule. The corresponding MD result is reported in italic.

|         | CaO:SiO <sub>2</sub> :Al <sub>2</sub> O <sub>3</sub><br>48.6:48.6:2.9 |             |             |             |             | CaO:SiO <sub>2</sub> :Al <sub>2</sub> O <sub>3</sub><br>47.1:47.1:5.9 |             |             |             |             | CaO:SiO <sub>2</sub> :Al <sub>2</sub> O <sub>3</sub><br>45.5:45.5:9.1 |             |             |             |             |
|---------|-----------------------------------------------------------------------|-------------|-------------|-------------|-------------|-----------------------------------------------------------------------|-------------|-------------|-------------|-------------|-----------------------------------------------------------------------|-------------|-------------|-------------|-------------|
| $mAl$   | $Q^0$                                                                 | $Q^1$       | $Q^2$       | $Q^3$       | $Q^4$       | $Q^0$                                                                 | $Q^1$       | $Q^2$       | $Q^3$       | $Q^4$       | $Q^0$                                                                 | $Q^1$       | $Q^2$       | $Q^3$       | $Q^4$       |
| 0       | 1.00                                                                  | 0.88        | 0.78        | 0.68        | 0.60        | 1.00                                                                  | 0.75        | 0.56        | 0.42        | 0.32        | 1.00                                                                  | 0.60        | 0.36        | 0.22        | 0.13        |
|         | <i>1.00</i>                                                           | <i>0.85</i> | <i>0.72</i> | <i>0.62</i> | <i>0.48</i> | <i>1.00</i>                                                           | <i>0.74</i> | <i>0.53</i> | <i>0.39</i> | <i>0.30</i> | <i>1.00</i>                                                           | <i>0.64</i> | <i>0.41</i> | <i>0.26</i> | <i>0.17</i> |
| 1       |                                                                       | 0.12        | 0.21        | 0.28        | 0.33        |                                                                       | 0.25        | 0.38        | 0.42        | 0.42        |                                                                       | 0.40        | 0.48        | 0.43        | 0.35        |
|         |                                                                       | <i>0.15</i> | <i>0.26</i> | <i>0.31</i> | <i>0.41</i> |                                                                       | <i>0.26</i> | <i>0.40</i> | <i>0.43</i> | <i>0.39</i> |                                                                       | <i>0.36</i> | <i>0.46</i> | <i>0.45</i> | <i>0.35</i> |
| 2       |                                                                       |             | 0.01        | 0.04        | 0.07        |                                                                       |             | 0.06        | 0.14        | 0.21        |                                                                       |             | 0.16        | 0.29        | 0.34        |
|         |                                                                       |             | <i>0.03</i> | <i>0.06</i> | <i>0.09</i> |                                                                       |             | <i>0.07</i> | <i>0.16</i> | <i>0.24</i> |                                                                       |             | <i>0.14</i> | <i>0.25</i> | <i>0.33</i> |
| 3       |                                                                       |             |             | 0.00        | 0.01        |                                                                       |             |             | 0.02        | 0.05        |                                                                       |             |             | 0.06        | 0.15        |
|         |                                                                       |             |             | <i>0.01</i> | <i>0.02</i> |                                                                       |             |             | <i>0.02</i> | <i>0.06</i> |                                                                       |             |             | <i>0.05</i> | <i>0.13</i> |
| 4       |                                                                       |             |             |             | 0.00        |                                                                       |             |             |             | 0.00        |                                                                       |             |             |             | 0.03        |
|         |                                                                       |             |             |             | <i>0.00</i> |                                                                       |             |             |             | <i>0.00</i> |                                                                       |             |             |             | <i>0.02</i> |
| $Q^n$ % | 2.6                                                                   | 18.0        | 38.3        | 32.0        | 9.07        | 1.66                                                                  | 13.1        | 35.1        | 36.4        | 13.7        | 0.85                                                                  | 9.27        | 31.1        | 40.3        | 18.4        |

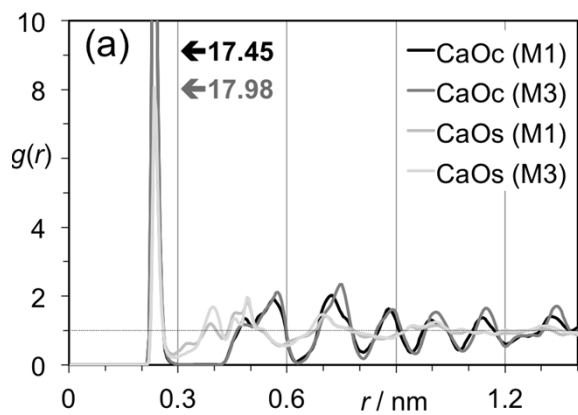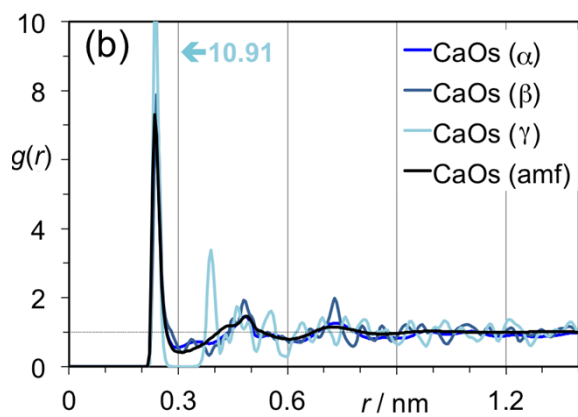

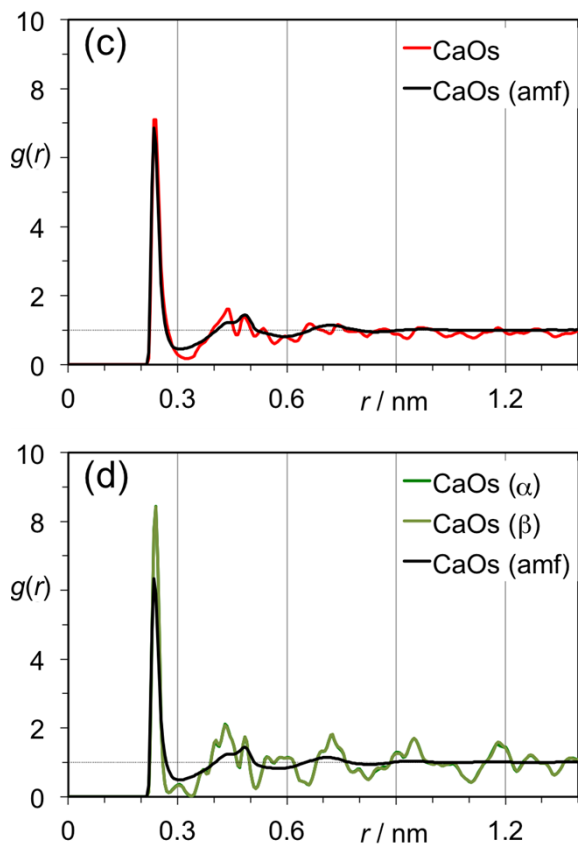

**Figure S1.** Radial pair distribution functions between calcium and oxygen atoms of: (a)  $M_1$  and  $M_3$  alite; (b)  $\alpha$ -,  $\beta$ -, and  $\gamma$ -belite; (c) rankinite and (d)  $\alpha$ -,  $\beta$ -wollastonite. The black lines in diagrams b-d represent the corresponding amorphous phases.

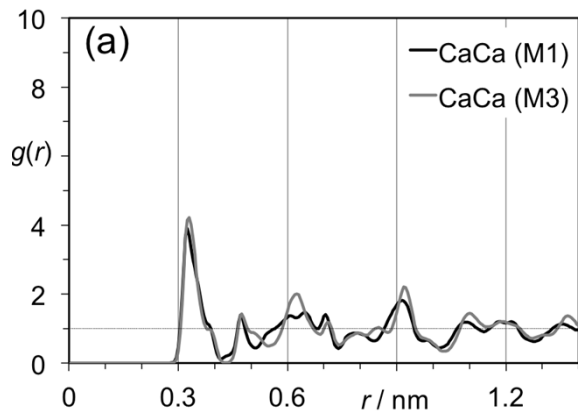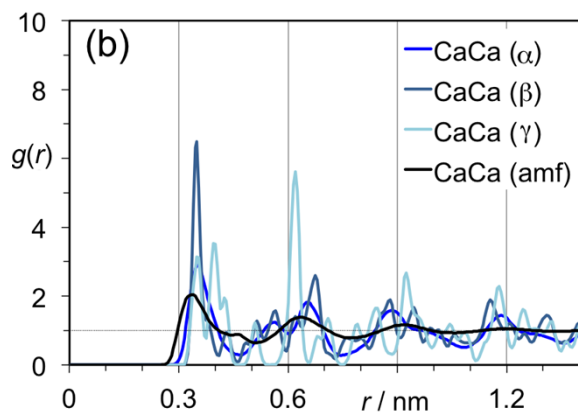

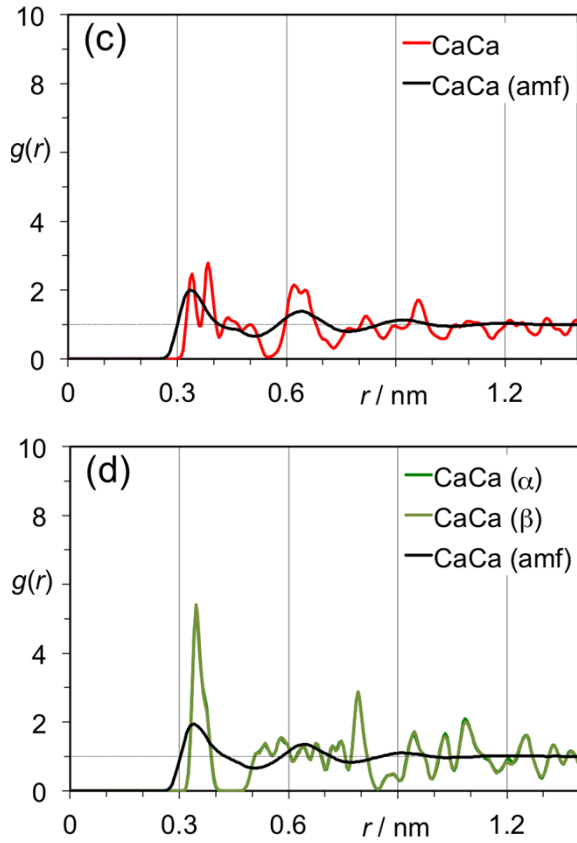

**Figure S2.** Radial pair distribution functions between calcium atoms of: (a)  $M_1$  and  $M_3$  alite; (b)  $\alpha$ -,  $\beta$ -, and  $\gamma$ -belite; (c) rankinite and (d)  $\alpha$ -,  $\beta$ -wollastonite. The black lines in diagrams b-d represent the corresponding amorphous phases.
